# Supplementary material
Source: publisher figshare collection journal article supplement (https://frontiersin.figshare.com/ndownloader/files/27669012)
Supplement: Supplementary file 1 [file 27669012]

Supplementary Material

# Section S1. Laboratory “seismic moment”

In nature for shear faulting on a planar surface, the scalar seismic potency is given by

**, (S1)**

where *l* is the final earthquake slip and *S* is the rupture area. The corresponding scalar seismic moment is

**, (S2)**

where *µ* is an ‘effective’ rigidity in the source region.

In laboratory the following product can be considered as an analogue of the seismic moment:

**, (S3)**

here *K*, *ΔL* and *s* are spring stiffness, cumulative slip and block length, correspondingly.

Indeed, if we suggest that the cumulative displacement is the same all over the area, then for natural events the scalar seismic moment is the product of the shear force drop *ΔF* at the rupture by the rupture length *s*:

**(S4)**

Here Δ*L* is the displacement along the fault, is the rupture area, Δτ is the drop of tangential stresses at the fault.

In the experiments with the slider the shear force drop is and the length of the block can be taken for the rupture length s.

# Section S2. AE scaling

According to (Lei, 2003) AE relative magnitude can be calculated from the maximum amplitude data as follows:

**(S5)**

Magnitude *M* corresponds to local magnitude *ML*. A high correlation is observed between *ML* and *Mw* (Baruah et al., 2012; Bethmann et al., 2011). Thus, we can assume that *M ~ Mw*. The moment magnitude is linked to the seismic moment through the well-known relation (Hanks and Kanamori, 1979):

**(S6)**

Reducing (S5) together with (S6) and taking into account that *M ~ Mw*, we obtain:

**(S7)**

In examining scaling of slow and fast earthquakes two characteristic relations are distinguished (Burgmann, 2018). The first (for slow EQs) is the proportionality between the characteristic duration *T* of the event and the seismic moment *M*0:

**(S8)**

The second (fast EQs) is the cubic moment-duration scaling:

**(S9)**

These relations correspond to laboratory ‘slow event’ scaling:

**(S10)**

and laboratory 'fast event’ scaling:

**(S11)**

# References

Baruah S., Baruah S., Kalita A., Biswas R., Gogoi N., Gautam J.L., et al. (2012). Moment magnitude – local magnitude relationshipfor the earthquakes of the Shillong-Mikir plateau, Northeastern India Region: a new perspective. Geomatics. Natural Hazards and Risk, 3:4, 365-375. <https://doi.org/10.1080/19475705.2011.596577>

Bethmann F., Deichmann N., Mai P. M. (2011). Scaling Relations of Local Magnitude versus Moment Magnitude for Sequences of Similar Earthquakes in Switzerland**.** 2011. Bulletin of the Seismological Society of America 101(2), 515-534. <https://doi.org/10.1785/0120100179>

Burgmann, R. (2018). The geophysics, geology and mechanics of slow fault slip. Earth and Planetary Science Letters 495, 112–134. <https://doi.org/10.1016/j.epsl.2018.04.062>

Hanks, T., Kanamori, H. (1979). A moment magnitude scale. J. Geophys. Res. 84, 2348–2350. <https://doi.org/10.1029/JB084iB05p02348>

Lei, X. (2003). How does asperities fracture? An experimental study of unbroken asperities. Earth and Planetary Science Letters 213, 347-359. <https://doi.org/10.1016/S0012-821X(03)00328-5>https://doi.org/10.1016/S0012-821X(03)00328-5.

**Supplementary Table S1.** Summary of the experiments. All tests were conducted under the same environmental conditions and loading rate. The rate of spring pulling was us = 8 µm/s.

| Exp. No. | Filler | Sliding regime | Mechanical parameters of sliding regime | | Acoustic emission parameters | | | | Efficiency of AE precursor (*Jm*) |
| --- | --- | --- | --- | --- | --- | --- | --- | --- | --- |
| *Vpeak*, mm/s | Friction (τS/σN) | max (*As*), dB | min (*AE rate*), s-1 | *b-value* | *w-value* |  |
| 1 | quartz sand (250-315μm) | Regular | 6.6±1.9 | 0.63 | 102.4±2.6 | 36±14 | 1.21±0.04 | 1.52±0.03 | 0.81 |
| 2 | quartz sand (250-315μm) | Regular | 5.8±1.8 | 0.63 | 99.3±2.7 | 28±11 | 1.37±0.06 | 1.68±0.03 | 0.82 |
| 3 | mixture of quartz sand (90%) and glass beads (10%) | Regular | 18.1±3.3 | 0.54 | 107.4±1.9 | 17±8 | 1.42±0.04 | 1.55±0.03 | 0.77 |
| 4 | mixture of quartz sand (90%) and glass beads (10%) | Regular | 12.9±1.8 | 0.58 | 106.1±1.4 | 18±8 | 1.45±0.04 | 1.60±0.03 | 0.85 |
| 5 | mixture of quartz sand (80%) and glass beads (20%) | Regular | 26.2±3.8 | 0.53 | 108.7±1.2 | 13±7 | 1.39±0.04 | 1.50±0.03 | 0.76 |
| 6 | mixture of quartz sand (80%) and glass beads (20%) | Regular | 20.4±2.8 | 0.57 | 107.3±1.2 | 14±7 | 1.49±0.05 | 1.59±0.03 | 0.80 |
| 7 | mixture of quartz sand (65%) and glass beads (35%) | Regular | 21.3±3.3 | 0.51 | 104.1±1.4 | 14±7 | 1.51±0.04 | 1.46±0.03 | 0.63 |
| 8 | mixture of quartz sand (65%) and glass beads (35%) | Regular | 25.7±3.2 | 0.52 | 105.6±1.6 | 11±6 | 1.59±0.04 | 1.46±0.03 | 0.59 |
| 9 | mixture of quartz sand (50%) and glass beads (50%) | Regular | 44.0±2.5 | 0.47 | 106.8±1.1 | 10±7 | 1.55±0.04 | 1.48±0.04 | 0.47 |
| 10 | mixture of quartz sand (50%) and glass beads (50%) | Regular | 33.0±3.4 | 0.46 | 104.2±1.5 | 8±5 | 1.72±0.03 | 1.37±0.03 | 0.83 |
| 11 | mixture of quartz sand (40%) and glass beads (60%) | Regular | 21.9±2.0 | 0.48 | 100.8±1.5 | 6±4 | 1.79±0.05 | 1.37±0.03 | 0.74 |
| 12 | mixture of quartz sand (40%) and glass beads (60%) | Regular | 24.5±2.7 | 0.47 | 101.6±1.1 | 5±3 | 1.67±0.04 | 1.31±0.04 | 0.80 |
| 13 | Artificial filler[[1]](#footnote-1) | Stochastic | 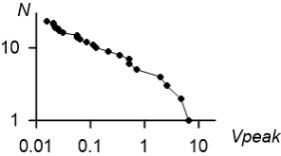 | 0.8 | 110.8±1.5 | – | 0.90±0.04 | 1.10±0.02 | 0.62 |
| 14 | Artificial filler | Stochastic | 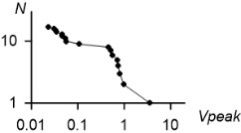 | 0.73 | 107.9±2.5 | – | 0.95±0.04 | 1.14±0.02 | 0.49 |
| 15 | Artificial filler | Stochastic | 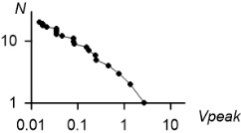 | 0.86 | 111.9±4.8 | – | 0.89±0.04 | 1.11±0.02 | 0.65 |
| 16 | Artificial filler | Stochastic | 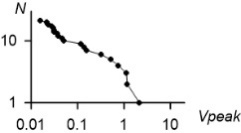 | 0.75 | 110.9±2.1 | – | 0.86±0.04 | 1.06±0.02 | 0.50 |
| 17 | Artificial filler | Stochastic | 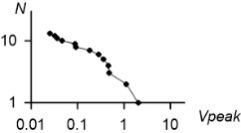 | 0.83 | 107.8±2.3 | – | 0.95±0.04 | 1.23±0.03 | 0.48 |
| 18 | Mixture of artificial filler (95%) and clay (5%) | Stochastic | 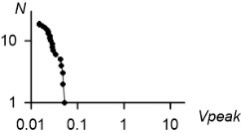 | 0.76 | 111.1±2.4 | – | 0.94±0.04 | 1.26±0.02 | 0.41 |
| 19 | Mixture of artificial filler (95%) and clay (5%) | Stochastic | 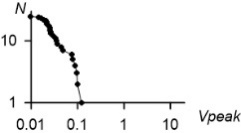 | 0.78 | 116.5±1.5 | – | 0.94±0.04 | 1.26±0.01 | 0.46 |
| 20 | Mixture of artificial filler (95%) and clay (5%) | Stochastic | 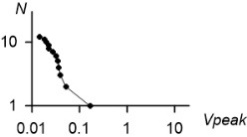 | 0.80 | 113.9±4.8 | – | 0.84±0.04 | 1.27±0.02 | 0.39 |
| 21 | Mixture of artificial filler (90%) and clay (10%) | Stochastic | 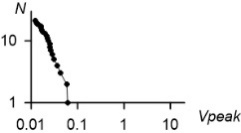 | 0.81 | 110.7±1.2 | – | 0.93±0.04 | 1.29±0.02 | 0.40 |
| 22 | Mixture of artificial filler (70%) and clay (30%) | Stable sliding | < 0.2 | 0.79 | – | – | 1.17±0.04 | 1.67±0.05 | – |
| 23 | Artificial filler | Stochastic | 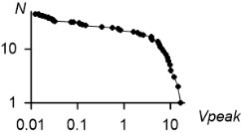 | 0.68 | 109.7±2.8 | – | 1.09±0.01 | 1.05±0.02 | 0.82 |
| 24 | Moistened artificial filler | Regular | 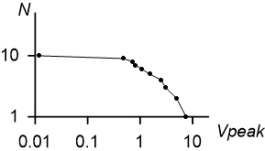 | 0.81 | 118.0±3.1 | – | 0.96±0.04 | 1.19±0.02 | 0.72 |

1. Granulometric composition of the quartz filler is given by the distribution: , where *ρ*0 = 300µm and *n*= 1 are the constant average grain size and distribution width, respectively. [↑](#footnote-ref-1)
